# Supplementary material for: Controlling alloy formation and optical properties by galvanic replacement of sub-20 nm silver nanoparticles in organic media
Source: Royal Society of Chemistry journal article supplement (doi:10.1039/c5ce00659g), 2015-01-01
Supplement: c5ce00659g1.pdf [file c5ce00659g1.pdf]

## Supplementary Information

### Controlling Alloy Formation and Optical Properties by Galvanic Replacement of Sub 20 nm Silver Nanoparticles in Organic Media

G. Collins, E. K. McCarty and J. D. Holmes

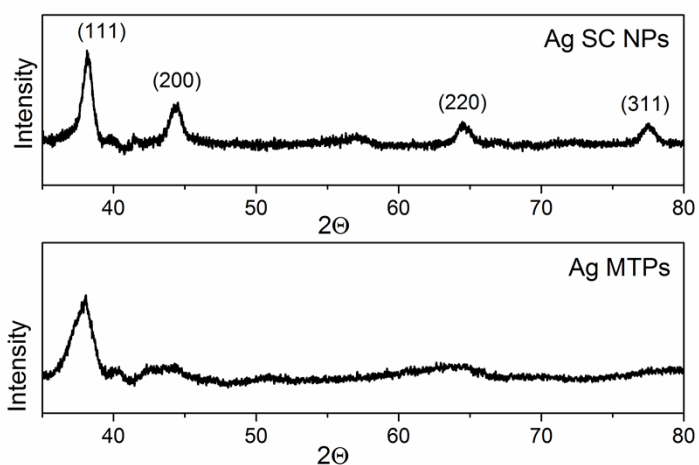

**Fig. S1.** XPD pattern of Ag single crystal (SC) and Ag multiply twinned particles (MTPs).

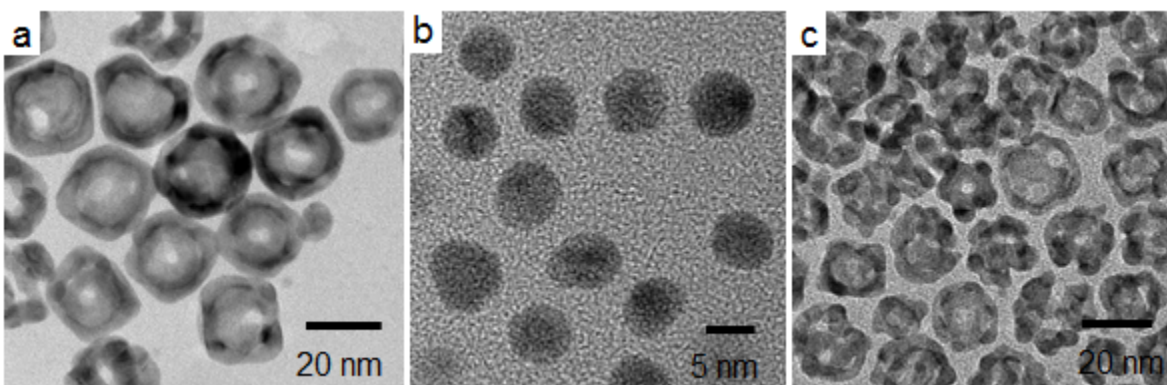

**Fig. S2.** Galvanic replacement of 16 nm single crystal NPs by (a-b) rapid precursor addition at 60 °C and (c) at room temperature.

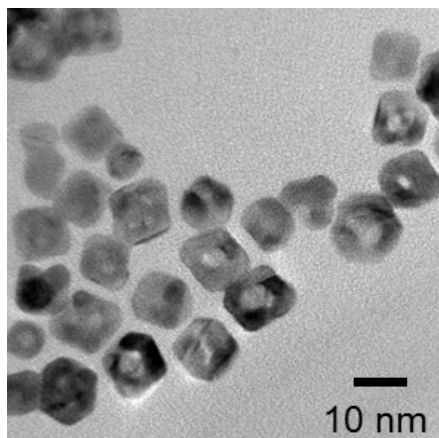

**Fig. S3.** Galvanic replacement of 9 nm single crystal NPs after ligand exchange with oleylamine.

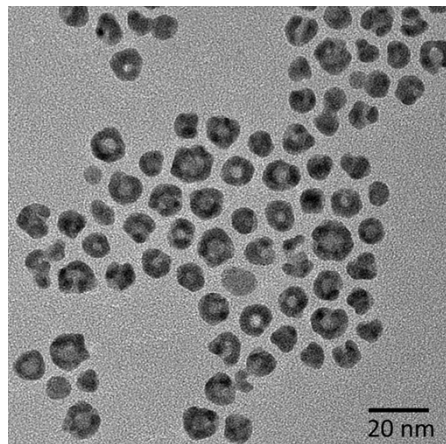

**Fig. S4.** Galvanic replacement of 15 nm MT Ag NPs at 100 °C.

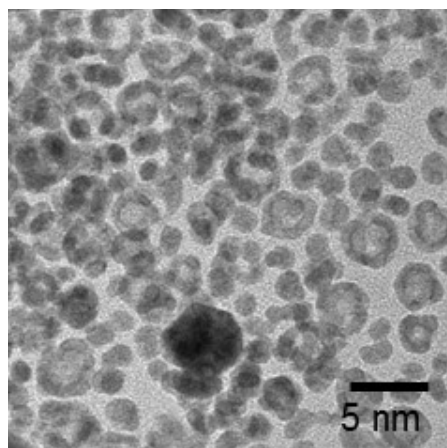

**Fig. S5.** Galvanic replacement of 15 nm MT Ag NPs at room temperature.
